# Supplementary material for: An injectable photocuring silk fibroin-based hydrogel for constructing an antioxidant microenvironment for skin repair
Source: Royal Society of Chemistry journal article supplement (doi:10.1039/d3tb02214e), 2024-01-01
Supplement: d3tb02214e1.pdf [file d3tb02214e1.pdf]

## Support Information

### Injectable photocuring silk fibroin-based hydrogel constructs antioxidant microenvironment for skin repair

Tangjinhai Liu <sup>a,b,1</sup>, Yuxiang Wang <sup>a,b,1</sup>, Jingyi Liu <sup>a,b</sup>, Xiaowen Han <sup>a,b</sup>, Yaping Zou <sup>a,b</sup>, Peilei Wang <sup>a,b</sup>, Ruiling Xu <sup>a,b</sup>, Lei Tong <sup>a,b</sup>, Junli Liu <sup>c,\*</sup>, Jie Liang <sup>a,b,d</sup>, Yong Sun <sup>a,b</sup>, Yujiang Fan <sup>a,b,\*</sup>, Xingdong Zhang <sup>a,b</sup>

<sup>a</sup> National Engineering Research Center for Biomaterials, Sichuan University, 29 Wangjiang Road, Chengdu, Sichuan, 610064, PR China

<sup>b</sup> College of Biomedical Engineering, Sichuan University, 29 Wangjiang Road, Chengdu, Sichuan, 610064, PR China

<sup>c</sup> Department of Orthopedics, Chongqing General Hospital, No. 118 Xingguang Avenue, Liangjiang New District, Chongqing, 401147, PR China

<sup>d</sup> Sichuan Testing Center for Biomaterials and Medical Devices, Sichuan University, 29 Wangjiang Road, Chengdu, 610064, PR China

<sup>1</sup> These authors contributed equally to this work.

**\* Corresponding author**

E-mail addresses: 18271929219@163.com (J. Liu), fan\_yujiang@scu.edu.cn (Y. Fan).

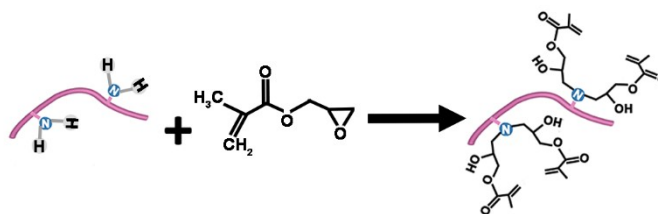

**Fig. S1.** The synthetic pathway of MASF.

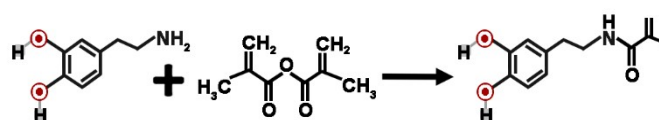

**Fig. S2.** The synthetic pathway of DMA.

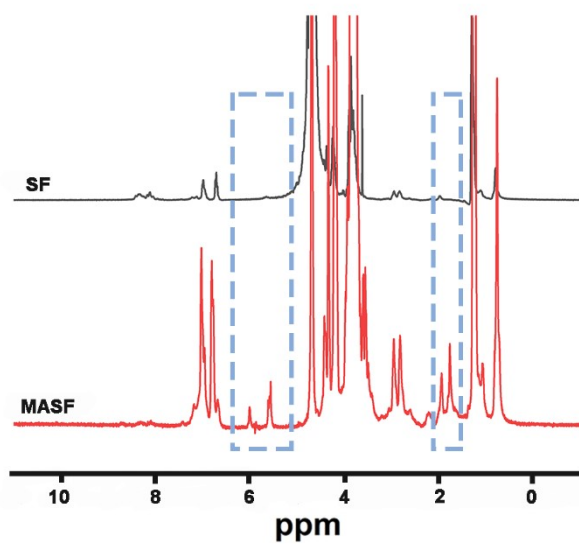

**Fig. S3.** The  $^1\text{H}$  NMR spectrum of SF and MASF.

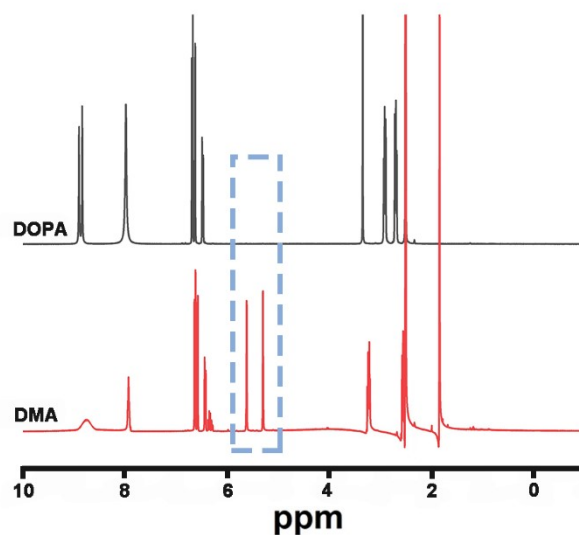

**Fig. S4.** The  $^1\text{H}$  NMR spectrum of DOPA and DMA.

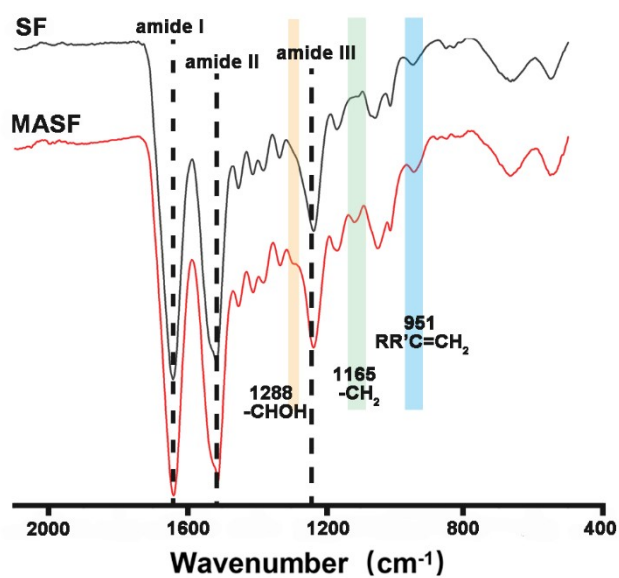

**Fig. S5.** The FTIR spectrum of SF and MASF.

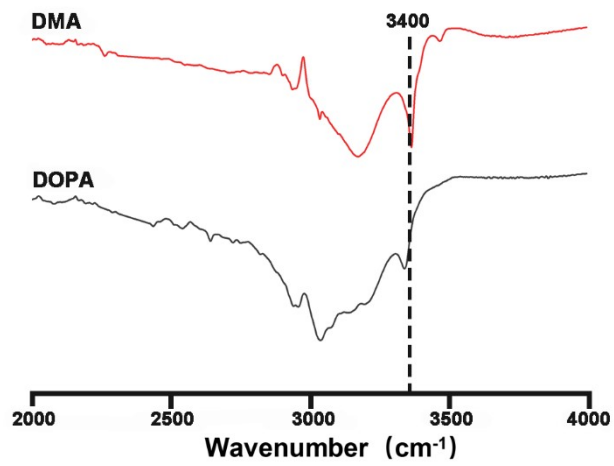

**Fig. S6.** The FTIR spectrum of DOPA and DMA.

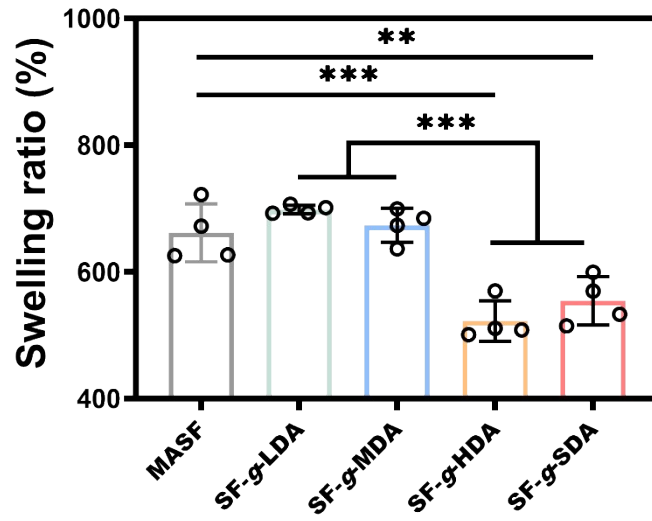

**Fig. S7.** Swelling ratio of hydrogels in 12 hours.

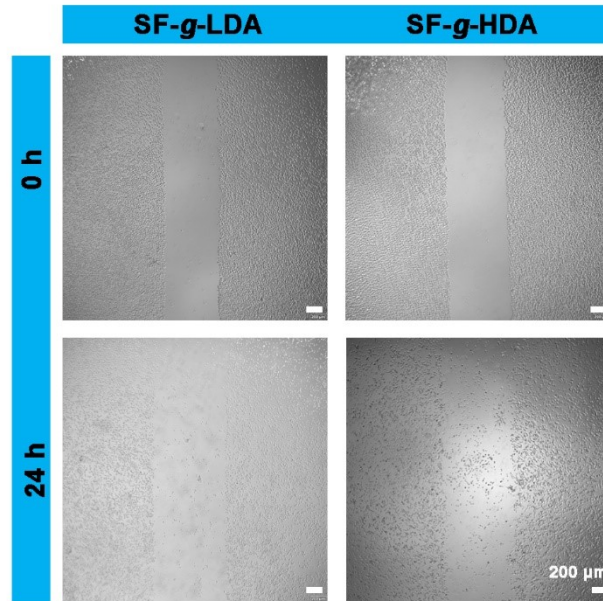

**Fig. S8.** Representative images of the closed wound for L929 cells in H<sub>2</sub>O<sub>2</sub>-injured in SF-g-LDA and SF-g-HAD.

**Table S1.** Components of different hydrogels.

| <b>Groups</b>   | <b>MASF (mg/mL)</b> | <b>DMA (mg/mL)</b> |
|-----------------|---------------------|--------------------|
| <b>MASF</b>     | 150                 | 0                  |
| <b>SF-g-LDA</b> | 147.5               | 2.5                |
| <b>SF-g-MDA</b> | 145                 | 5                  |
| <b>SF-g-HDA</b> | 142.5               | 7.5                |
| <b>SF-g-SDA</b> | 140                 | 10                 |
